# Supplementary material for: Validation of a type 1 diabetes algorithm using electronic medical records and administrative healthcare data to study the population incidence and prevalence of type 1 diabetes in Ontario, Canada
Source: PubMed Central journal article supplement — BMJ Open Diabetes Res Care. 2020 Jun 21;8(1):e001224. doi: 10.1136/bmjdrc-2020-001224 (PMC7307536; doi:10.1136/bmjdrc-2020-001224), 2020-06-21
Supplement: bmjdrc-2020-001224supp001.pdf [file bmjdrc-2020-001224supp001.pdf]

**Table 3: Descriptive characteristics of LMC Diabetes Registry individuals**

| <b>Descriptive Characteristic</b>                        | <b>T1D (n=2379)</b> | <b>T2D (n=26,992)</b> |
|----------------------------------------------------------|---------------------|-----------------------|
| <i>LMC Diabetes Registry Variables</i>                   |                     |                       |
| Male Sex                                                 | 1,272 (53.5%)       | 15,098 (55.9%)        |
| Age at Index                                             | 40 [28-52[          | 61 [52-69]            |
| Age at Index <25                                         | 358 (15.0%)         | 108 (0.4%)            |
| Age at Index <30                                         | 643 (27.0%)         | 302 (1.1%)            |
| Age at Diabetes Diagnosis*                               | 25 [16-35]          | 49 [42-58]            |
| Age at Diabetes Diagnosis < 25                           | 1,118 (47.2%)       | 379 (1.4%)            |
| Age at Diabetes Diagnosis < 30                           | 1,427 (60.2%)       | 1,110 (4.1%)          |
| Metformin Use                                            | 153 (6.4%)          | 20,462 (75.8%)        |
| Insulin Use                                              | 2,322 (97.6%)       | 11,958 (44.3%)        |
| Non-insulin, non-metformin antihyperglycemic medication  | 104 (4.4%)          | 17,342 (64.2%)        |
| <i>Administrative Data Variables</i>                     |                     |                       |
| Insulin†                                                 | 529 (93.6%)         | 5,492 (44.7%)         |
| Bolus Insulin†                                           | 521 (92.2%)         | 3,808 (31.0%)         |
| Metformin†                                               | 51 (9.0%)           | 7,084 (57.7%)         |
| Non-insulin, non-metformin antihyperglycemic medication† | 26 (4.6%)           | 7,350 (59.9%)         |
| Any DKA                                                  | 690 (29.0%)         | 372 (1.4%)            |
| Hospitalization/ED visit for Type 1 DKA                  | 432 (18.2%)         | 66 (0.2%)             |
| Hospitalization/ED visit for Type w DKA                  | 105 (4.4%)          | 277 (1.0%)            |
| Insulin Pump                                             | 1,094 (46.0%)       | 24 (0.1%)             |
| Type 1 ICD-10 hospital code                              | 395 (16.6%)         | 528 (2.0%)            |
| Type 2 ICD-10 hospital code                              | 690 (29.0%)         | 13,688 (50.7%)        |
| Diabetes less than age 19                                | 728 (30.6%)         | 81 (0.3%)             |
| eGFR                                                     | 101.21 ± 23.24      | 83.17 ± 24.23         |
| eGFR ≤ 30                                                | 27 (1.4%)           | 644 (3.2%)            |
| eGFR ≤ 45                                                | 58 (2.9%)           | 1,750 (8.7%)          |

\*Age at diagnosis was missing for 8 individuals with T1D and 230 individuals with T2D.

†Denominator for medication use using administrative data was individuals who had any medication claim within ±365 days of index date, since not all individuals have medication data available in administrative data

**Table 4: Random Forest Variable Importance Factors**

| <b>Variable</b>                                         | <b>Mean Decrease Accuracy</b> | <b>Mean Decrease Gini</b> |
|---------------------------------------------------------|-------------------------------|---------------------------|
| <i>EMR Data</i>                                         |                               |                           |
| Definite T1D in CPP                                     | 0.89                          | 131.84                    |
| Possible T1D in CPP                                     | 0.17                          | 4.22                      |
| Definite T2D in CPP                                     | 0.61                          | 12.66                     |
| Secondary diabetes in CPP                               | 0.07                          | 0.45                      |
| Age at index date                                       | 0.64                          | 41.73                     |
| BMI                                                     | 0.51                          | 23.98                     |
| Insulin                                                 | 0.78                          | 30.79                     |
| Non-insulin, non-metformin antihyperglycemic medication | 0.81                          | 23.39                     |
| Metformin                                               | 0.67                          | 26.87                     |
| eGFR                                                    | 0.32                          | 14.95                     |
| Basal insulin only                                      | 0.49                          | 3.71                      |
| Bolus Insulin                                           | 0.64                          | 34.01                     |
| <i>Administrative Data</i>                              |                               |                           |
| Bolus insulin                                           | 0.65                          | 2.39                      |
| T1D DKA                                                 | 2.03                          | 4.65                      |
| Insulin management code                                 | -0.45                         | 1.07                      |
| Insulin pump                                            | 2.75                          | 12.78                     |
| Pancreas Transplant                                     | -0.32                         | 0.32                      |
| Partial Pancreatectomy                                  | -0.30                         | 0.12                      |
| Pediatric DKA                                           | 0.35                          | 0.13                      |
| Pediatric Diabetes                                      | 1.73                          | 6.99                      |
| T2D DKA                                                 | 0.70                          | 1.01                      |
| Glucagon                                                | 1.26                          | 4.30                      |
| Insulin                                                 | 0.69                          | 1.86                      |
| Metformin                                               | 1.71                          | 5.93                      |
| Non-insulin, non-metformin antihyperglycemic medication | 0.57                          | 1.93                      |
| Total pancreatectomy                                    | 0.00                          | 0.01                      |
| T1D                                                     | 1.83                          | 4.89                      |
| T2D                                                     | 2.44                          | 16.48                     |
| Age at incident diabetes                                | 3.10                          | 57.76                     |
| eGFR                                                    | 1.43                          | 20.77                     |
| Age at index                                            | 2.27                          | 32.20                     |
| Any DKA                                                 | 1.73                          | 4.27                      |
| <i>Combined EMR and Administrative Data</i>             |                               |                           |
| BMI                                                     | 0.53                          | 18.68                     |
| Age at index                                            | 0.51                          | 21.91                     |
| Age at incident diabetes                                | 0.71                          | 54.34                     |
| eGFR                                                    | 0.36                          | 11.87                     |
| Definite T1D in CPP                                     | 0.86                          | 107.69                    |
| Possible T1D in CPP                                     | -0.03                         | 2.90                      |
| Definite T2D in CPP                                     | 0.58                          | 8.06                      |
| Secondary diabetes in CPP                               | 0.08                          | 0.22                      |
| Any DKA                                                 | 0.19                          | 4.83                      |
| Bolus insulin                                           | 0.71                          | 21.98                     |

---

|                                                         |      |       |
|---------------------------------------------------------|------|-------|
| T1D DKA                                                 | 0.28 | 5.87  |
| Insulin                                                 | 0.79 | 21.98 |
| Insulin pump                                            | 0.65 | 27.07 |
| Metformin                                               | 0.67 | 18.22 |
| Non-insulin, non-metformin antihyperglycemic medication | 0.78 | 15.95 |
| Pediatric diabetes                                      | 0.42 | 17.55 |
| T2D DKA                                                 | 0.21 | 0.85  |
| T1D                                                     | 0.24 | 4.28  |
| T2D                                                     | 0.49 | 4.43  |

---

**Table 5: Performance of selected administrative data algorithms in LMC Diabetes Registry**

| <b>Algorithm Description</b>                                                                            | <b>Sensitivity (95% CI)</b> | <b>Specificity (95% CI)</b> | <b>PPV (95% CI)</b> | <b>NPV (95% CI)</b> |
|---------------------------------------------------------------------------------------------------------|-----------------------------|-----------------------------|---------------------|---------------------|
| Pediatric Diabetes or Pump or Type 1 DKA                                                                | 64.0 (62.0, 65.9)           | 99.4 (99.3, 99.5)           | 90.3 (88.8, 91.7)   | 96.9 (96.7, 97.1)   |
| Pediatric diabetes or pump                                                                              | 58.9 (56.9, 60.9)           | 99.6 (99.5, 99.7)           | 93.2 (91.8, 94.4)   | 96.5 (96.3, 96.7)   |
| [Diabetes incidence <30 + (pediatric diabetes or DKA)] or pump or type 1 DKA                            | 65.4 (63.4, 67.3)           | 99.3 (99.2, 99.4)           | 89.5 (87.9, 90.9)   | 97.0 (96.8, 97.2)   |
| Diabetes incidence <30 or pump or any DKA                                                               | 79.9 (78.2, 81.5)           | 94.6 (94.3, 94.9)           | 56.6 (54.9, 58.3)   | 98.2 (98.0, 98.3)   |
| Diabetes incidence < 30 or (diabetes incidence < 40 and no T2D hospitalization code) or pump or any DKA | 86.6 (85.2, 87.9)           | 86.7 (86.3, 87.1)           | 36.4 (35.2, 37.7)   | 98.7 (98.5, 98.8)   |

**Table 6: Crude and age- and sex-standardized prevalence rates of T1D in Ontario from 2010 to 2017 per 1000 person-years**

|                                                                                             | Crude |                        |      | Age- and sex-standardized |                       |      |
|---------------------------------------------------------------------------------------------|-------|------------------------|------|---------------------------|-----------------------|------|
|                                                                                             | Rate  | 95 % Confidence Limits |      | Rate                      | 95% Confidence Limits |      |
| <i>Algorithm 1: Pediatric diabetes or pump</i>                                              |       |                        |      |                           |                       |      |
| 2010                                                                                        | 1.46  | 1.44                   | 1.33 | 1.7                       | 1.68                  | 1.73 |
| 2011                                                                                        | 1.59  | 1.57                   | 1.62 | 1.85                      | 1.82                  | 1.88 |
| 2012                                                                                        | 1.7   | 1.67                   | 1.72 | 1.97                      | 1.94                  | 2.00 |
| 2013                                                                                        | 1.8   | 1.78                   | 1.83 | 2.1                       | 2.07                  | 2.13 |
| 2014                                                                                        | 1.9   | 1.87                   | 1.92 | 2.22                      | 2.19                  | 2.25 |
| 2015                                                                                        | 1.99  | 1.97                   | 2.02 | 2.34                      | 2.31                  | 2.37 |
| 2016                                                                                        | 2.08  | 2.05                   | 2.11 | 2.45                      | 2.42                  | 2.48 |
| 2017                                                                                        | 2.16  | 2.14                   | 2.19 | 2.56                      | 2.53                  | 2.60 |
| <i>Algorithm 2: [age at ODD &lt;30 + (pediatric diabetes or DKA)] or pump or type 1 DKA</i> |       |                        |      |                           |                       |      |
| 2010                                                                                        | 2.13  | 2.10                   | 2.16 | 2.38                      | 2.35                  | 2.41 |
| 2011                                                                                        | 2.27  | 2.25                   | 2.30 | 2.54                      | 2.51                  | 2.57 |
| 2012                                                                                        | 2.39  | 2.36                   | 2.42 | 2.67                      | 2.64                  | 2.71 |
| 2013                                                                                        | 2.51  | 2.48                   | 2.54 | 2.81                      | 2.78                  | 2.85 |
| 2014                                                                                        | 2.62  | 2.59                   | 2.65 | 2.95                      | 2.91                  | 2.98 |
| 2015                                                                                        | 2.73  | 2.70                   | 2.76 | 3.07                      | 3.04                  | 3.11 |
| 2016                                                                                        | 2.84  | 2.81                   | 2.87 | 3.2                       | 3.16                  | 3.24 |
| 2017                                                                                        | 2.94  | 2.91                   | 2.97 | 3.33                      | 3.29                  | 3.36 |
| <i>Algorithm 3: age at ODD Incidence &lt; 30 or pump or any DKA</i>                         |       |                        |      |                           |                       |      |
| 2010                                                                                        | 6.9   | 6.85                   | 6.95 | 7.48                      | 7.43                  | 7.54 |
| 2011                                                                                        | 7.16  | 7.11                   | 7.21 | 7.8                       | 7.74                  | 7.86 |
| 2012                                                                                        | 7.4   | 7.35                   | 7.45 | 8.09                      | 8.03                  | 8.14 |
| 2013                                                                                        | 7.66  | 7.61                   | 7.71 | 8.4                       | 8.34                  | 8.46 |
| 2014                                                                                        | 7.94  | 7.88                   | 7.99 | 8.74                      | 8.68                  | 8.79 |
| 2015                                                                                        | 8.22  | 8.17                   | 8.27 | 9.07                      | 9.01                  | 9.13 |
| 2016                                                                                        | 8.52  | 8.47                   | 8.58 | 9.4                       | 9.34                  | 9.47 |
| 2017                                                                                        | 8.92  | 8.87                   | 8.98 | 9.86                      | 9.79                  | 9.92 |

**Table 7: Crude and age- and sex-standardized incidence rates of T1D in Ontario from 2010 to 2017 per 1000 person-years**

|                                                                                                       | Crude |                        |      | Age- and sex-standardized |                       |       |
|-------------------------------------------------------------------------------------------------------|-------|------------------------|------|---------------------------|-----------------------|-------|
|                                                                                                       | Rate  | 95 % Confidence Limits |      | Rate                      | 95% Confidence Limits |       |
| <b>Admin<sub>Rule 1</sub>: Pediatric diabetes or pump</b>                                             |       |                        |      |                           |                       |       |
| 2010                                                                                                  | 0.1   | 0.09                   | 0.10 | 0.1                       | 0.09                  | 0.10  |
| 2011                                                                                                  | 0.07  | 0.07                   | 0.08 | 0.07                      | 0.07                  | 0.08  |
| 2012                                                                                                  | 0.06  | 0.05                   | 0.06 | 0.06                      | 0.05                  | 0.06  |
| 2013                                                                                                  | 0.05  | 0.04                   | 0.05 | 0.05                      | 0.04                  | 0.05  |
| 2014                                                                                                  | 0.04  | 0.04                   | 0.05 | 0.04                      | 0.04                  | 0.05  |
| 2015                                                                                                  | 0.04  | 0.04                   | 0.04 | 0.04                      | 0.04                  | 0.05  |
| 2016                                                                                                  | 0.04  | 0.04                   | 0.04 | 0.04                      | 0.04                  | 0.05  |
| 2017                                                                                                  | 0.03  | 0.03                   | 0.04 | 0.04                      | 0.03                  | 0.04  |
| <b>Admin<sub>Rule 3</sub> [age at ODD &lt;30 + (pediatric diabetes or DKA)] or pump or type 1 DKA</b> |       |                        |      |                           |                       |       |
| 2010                                                                                                  | 0.14  | 0.13                   | 0.15 | 0.14                      | 0.13                  | 0.15  |
| 2011                                                                                                  | 0.12  | 0.11                   | 0.13 | 0.12                      | 0.11                  | 0.13  |
| 2012                                                                                                  | 0.11  | 0.10                   | 0.11 | 0.11                      | 0.10                  | 0.11  |
| 2013                                                                                                  | 0.09  | 0.09                   | 0.10 | 0.1                       | 0.09                  | 0.10  |
| 2014                                                                                                  | 0.09  | 0.09                   | 0.10 | 0.09                      | 0.09                  | 0.10  |
| 2015                                                                                                  | 0.09  | 0.08                   | 0.09 | 0.09                      | 0.08                  | 0.09  |
| 2016                                                                                                  | 0.09  | 0.09                   | 0.10 | 0.1                       | 0.09                  | 0.10  |
| 2017                                                                                                  | 0.09  | 0.08                   | 0.09 | 0.09                      | 0.08                  | 0.10  |
| <b>Admin<sub>Rule 4</sub>: age at ODD Incidence &lt; 30 or pump or any DKA</b>                        |       |                        |      |                           |                       |       |
| 2010                                                                                                  | 0.45  | 0.44                   | 0.46 | 0.47                      | 0.46                  | 0.49  |
| 2011                                                                                                  | 0.43  | 0.42                   | 0.44 | 0.45                      | 0.44                  | 0.47  |
| 2012                                                                                                  | 0.43  | 0.42                   | 0.44 | 0.45                      | 0.43                  | 0.46  |
| 2013                                                                                                  | 0.42  | 0.41                   | 0.44 | 0.44                      | 0.43                  | 0.46  |
| 2014                                                                                                  | 0.45  | 0.43                   | 0.46 | 0.46                      | 0.45                  | 0.48  |
| 2015                                                                                                  | 0.45  | 0.44                   | 0.46 | 0.47                      | 0.46                  | 0.48  |
| 2016                                                                                                  | 0.5   | 0.48                   | 0.51 | 0.51                      | 0.50                  | 0.53  |
| 2017                                                                                                  | 0.58  | 0.57                   | 0.59 | 0.61                      | 0.60                  | 0.63) |

**Table 8: Negative binomial regression for evaluation of prevalence and incidence trends of T1D from 2010 to 2017 (with 2010 as the reference) computed by age-sex strata with follow-up time as an offset**

|                                                                                                        | Prevalence |                          |         |            | Incidence                |         |      |        |
|--------------------------------------------------------------------------------------------------------|------------|--------------------------|---------|------------|--------------------------|---------|------|--------|
|                                                                                                        | Rate Ratio | RR 95% Confidence Limits | p-value | Rate Ratio | RR 95% Confidence Limits | p-value |      |        |
| <b>Admin<sub>Rule 1</sub>: Pediatric diabetes or pump</b>                                              |            |                          |         |            |                          |         |      |        |
| 2011                                                                                                   | 1.15       | 1.03                     | 1.29    | 0.014      | 0.79                     | 0.67    | 0.92 | 0.003  |
| 2012                                                                                                   | 1.29       | 1.15                     | 1.44    | <.0001     | 0.64                     | 0.55    | 0.75 | <.0001 |
| 2013                                                                                                   | 1.43       | 1.28                     | 1.60    | <.0001     | 0.53                     | 0.45    | 0.63 | <.0001 |
| 2014                                                                                                   | 1.57       | 1.41                     | 1.76    | <.0001     | 0.50                     | 0.42    | 0.59 | <.0001 |
| 2015                                                                                                   | 1.72       | 1.54                     | 1.92    | <.0001     | 0.49                     | 0.41    | 0.58 | <.0001 |
| 2016                                                                                                   | 1.87       | 1.67                     | 2.09    | <.0001     | 0.50                     | 0.42    | 0.60 | <.0001 |
| 2017                                                                                                   | 2.01       | 1.80                     | 2.25    | <.0001     | 0.44                     | 0.37    | 0.52 | <.0001 |
| Age 30-49                                                                                              | 0.76       | 0.70                     | 0.82    | <.0001     | 2.86                     | 2.54    | 3.21 | <.0001 |
| Age 50-64                                                                                              | 0.23       | 0.21                     | 0.25    | <.0001     | 1.74                     | 1.54    | 1.96 | <.0001 |
| Age >65                                                                                                | 0.07       | 0.06                     | 0.07    | <.0001     | 0.32                     | 0.28    | 0.38 | <.0001 |
| Male Sex                                                                                               | 0.98       | 0.93                     | 1.04    | 0.45       | 1.00                     | 0.92    | 1.09 | 0.97   |
| <b>Admin<sub>Rule 3</sub>: [age at ODD &lt;30 + (pediatric diabetes or DKA)] or pump or type 1 DKA</b> |            |                          |         |            |                          |         |      |        |
| 2011                                                                                                   | 1.10       | 1.01                     | 1.20    | 0.03       | 0.90                     | 0.78    | 1.04 | 0.16   |
| 2012                                                                                                   | 1.20       | 1.10                     | 1.31    | <.0001     | 0.82                     | 0.71    | 0.95 | 0.01   |
| 2013                                                                                                   | 1.30       | 1.19                     | 1.42    | <.0001     | 0.76                     | 0.65    | 0.88 | 0.00   |
| 2014                                                                                                   | 1.40       | 1.28                     | 1.53    | <.0001     | 0.76                     | 0.65    | 0.88 | 0.00   |
| 2015                                                                                                   | 1.50       | 1.37                     | 1.64    | <.0001     | 0.71                     | 0.61    | 0.82 | <.0001 |
| 2016                                                                                                   | 1.61       | 1.47                     | 1.75    | <.0001     | 0.80                     | 0.69    | 0.93 | 0.00   |
| 2017                                                                                                   | 1.70       | 1.56                     | 1.86    | <.0001     | 0.76                     | 0.65    | 0.88 | 0.00   |
| Age 30-49                                                                                              | 1.12       | 1.06                     | 1.20    | 0.00       | 1.98                     | 1.78    | 2.20 | <.0001 |
| Age 50-64                                                                                              | 0.43       | 0.40                     | 0.46    | <.0001     | 1.49                     | 1.34    | 1.66 | <.0001 |
| Age >65                                                                                                | 0.16       | 0.15                     | 0.18    | <.0001     | 0.74                     | 0.66    | 0.82 | <.0001 |
| Male Sex                                                                                               | 1.02       | 0.98                     | 1.07    | 0.33       | 1.15                     | 1.07    | 1.24 | 0.00   |
| <b>Admin<sub>Rule 4</sub>: age at ODD Incidence &lt; 30 or pump or any DKA</b>                         |            |                          |         |            |                          |         |      |        |
| 2011                                                                                                   | 1.06       | 0.96                     | 1.17    | 0.29       | 0.96                     | 0.80    | 1.15 | 0.67   |
| 2012                                                                                                   | 1.12       | 1.02                     | 1.24    | 0.02       | 0.96                     | 0.80    | 1.15 | 0.67   |
| 2013                                                                                                   | 1.19       | 1.08                     | 1.31    | 0.00       | 0.96                     | 0.80    | 1.15 | 0.68   |
| 2014                                                                                                   | 1.27       | 1.14                     | 1.40    | <.0001     | 1.01                     | 0.84    | 1.21 | 0.93   |
| 2015                                                                                                   | 1.34       | 1.21                     | 1.48    | <.0001     | 1.02                     | 0.85    | 1.22 | 0.83   |
| 2016                                                                                                   | 1.43       | 1.29                     | 1.58    | <.0001     | 1.17                     | 0.98    | 1.40 | 0.08   |
| 2017                                                                                                   | 1.53       | 1.39                     | 1.70    | <.0001     | 1.33                     | 1.11    | 1.59 | 0.00   |
| Age 30-49                                                                                              | 1.93       | 1.80                     | 2.07    | <.0001     | 0.23                     | 0.21    | 0.27 | <.0001 |

---

|           |      |      |      |        |      |      |      |        |
|-----------|------|------|------|--------|------|------|------|--------|
| Age 50-64 | 0.53 | 0.50 | 0.57 | <.0001 | 0.42 | 0.37 | 0.48 | <.0001 |
| Age >65   | 0.43 | 0.40 | 0.46 | <.0001 | 0.56 | 0.50 | 0.64 | <.0001 |
| Male Sex  | 0.90 | 0.86 | 0.95 | <.0001 | 1.06 | 0.97 | 1.16 | 0.23   |

---

**Table 9: Performance of selected administrative data algorithms in LMC Diabetes Registry stratified by age category**

| Algorithm                                                            | Sensitivity (95% CI) | Specificity (95% CI) | PPV (95% CI)      | NPV (95% CI)      |
|----------------------------------------------------------------------|----------------------|----------------------|-------------------|-------------------|
| <i>Age &gt; 40</i>                                                   |                      |                      |                   |                   |
| Pediatric Diabetes or Pump or Type 1 DKA                             | 50.6 (47.7, 53.6)    | 99.7 (99.6, 99.8)    | 89.1 (86.4, 91.3) | 97.8 (97.6, 98.0) |
| Pediatric diabetes or pump                                           | 44.1 (41.2, 47.0)    | 99.9 (99.9, 100.0)   | 97.0 (95.1, 98.3) | 97.5 (97.3, 97.7) |
| [age at ODD <30 + (pediatric diabetes or DKA)] or pump or type 1 DKA | 52.3 (49.4, 55.2)    | 99.7 (99.6, 99.7)    | 88.3 (85.7, 90.6) | 97.9 (97.7, 98.0) |
| <i>Age ≤40</i>                                                       |                      |                      |                   |                   |
| Pediatric Diabetes or Pump or Type 1 DKA                             | 76.6 (74.1, 78.9)    | 94.8 (93.6, 95.8)    | 91.1 (89.2, 92.8) | 85.3 (83.6, 86.8) |
| Pediatric diabetes or pump                                           | 73.0 (70.4, 75.5)    | 95.1 (94.0, 96.0)    | 91.2 (89.3, 92.9) | 83.4 (81.7, 85.0) |
| [age at ODD <30 + (pediatric diabetes or DKA)] or pump or type 1 DKA | 77.7 (75.3, 80.0)    | 94.1 (92.9, 95.2)    | 90.2 (88.3, 91.9) | 85.8 (84.2, 87.3) |

**Appendix 1:** Abstraction Criteria for Classifying Diabetes as Definite T1D, Possible T1D, or not T1D

- Select [**Def**] if there is a diagnosis of type 1 diabetes recorded in the EMR entry by the family physician or specialist (any medical doctor) and no diagnosis of type 2 diabetes recorded. Terms for type 1 diabetes are: type 1 diabetes, T1D, T1DM, latent autoimmune diabetes in adults (LADA), juvenile diabetes, juvenile-onset diabetes
- Select [**Poss**] if ‘rule out’, ‘R/O’, ‘?’, ‘possible’ or other query term precedes type 1 diabetes or its synonyms
- Select [**Poss**] if there is only documentation by a health care provider that is not a physician
- Select [**Poss**] if there is the following in the **absence** of the term “type 1 diabetes” or “type 2 diabetes”:
  - Diabetic ketoacidosis/DKA
  - Age at diagnosis  $\leq 30$
  - BMI  $< 25$
  - Insulin pump use
- Select [**Poss**] if both type 1 and type 2 diabetes terms recorded
- Select [**Poss**] if IDDM or insulin-dependent DM is recorded and no type 1 diabetes terms
- Select [**Poss**] if the terms type 1 diabetes or type 2 diabetes are not mentioned the EMR entry.
- Select [**No**] if type 2 diabetes recorded and no type 1 diabetes terms

**Appendix 2:** Codes used for administrative data variables

| Variable                | Database  | Definition                                                                                                                                                                                                                                                                                                                                                                                                                                                                                                                                                                                              |
|-------------------------|-----------|---------------------------------------------------------------------------------------------------------------------------------------------------------------------------------------------------------------------------------------------------------------------------------------------------------------------------------------------------------------------------------------------------------------------------------------------------------------------------------------------------------------------------------------------------------------------------------------------------------|
| Index Date              | EMRALD    | Date of last visit with family physician in EMRALD to be provided by EMRALD data. Index date = EMRALD last visit date + 30 days All variables should use data prior to the <b>first of either Sept 30, 2015 or subject's index date with only exception being OHIP plus</b>                                                                                                                                                                                                                                                                                                                             |
| Diabetes diagnosis date | ODD       | Date on which criteria for incident ODD first met. (dxdate in ODD)                                                                                                                                                                                                                                                                                                                                                                                                                                                                                                                                      |
| Age at diagnosis        | ODD, RPDB | Age on ODD incidence date                                                                                                                                                                                                                                                                                                                                                                                                                                                                                                                                                                               |
| Age at diagnosis ≤30    | ODB, RPDB | If age at diagnosis is ≤30 then yes; if age >30 then no; If age at diagnosis not available then missing                                                                                                                                                                                                                                                                                                                                                                                                                                                                                                 |
| Age at diagnosis ≤25    | ODB, RPDB | If age at diagnosis is ≤25 then yes; if age >25 then no; If age at diagnosis not available then missing                                                                                                                                                                                                                                                                                                                                                                                                                                                                                                 |
| Age on index date       | RPDB      | Age on index date                                                                                                                                                                                                                                                                                                                                                                                                                                                                                                                                                                                       |
| Index date age ≤30      | RPDB      | Categorized age variable                                                                                                                                                                                                                                                                                                                                                                                                                                                                                                                                                                                |
| Index date age ≤25      | RPDB      | Categorized age variable                                                                                                                                                                                                                                                                                                                                                                                                                                                                                                                                                                                |
| Sex                     | RPDB      | Male= 0 or Female =1                                                                                                                                                                                                                                                                                                                                                                                                                                                                                                                                                                                    |
| ODD Flag                | ODD       | ODD Flag =yes if ODD incident date is prior to or on index date<br>ODD Flag = no if not in ODD or ODD incident date is later than index date                                                                                                                                                                                                                                                                                                                                                                                                                                                            |
| ODB Flag                | ODB       | For all subjects in cohort, do 1 year lookback from index date and 1 year look-forward from index date (2 year time window in total). In those 2 years, look for any medication claim in ODB using plantype A, C, D, F, K, L, M, N, T, Y.<br>Exclude the following PINs:<br>93899979, 93899981, 93899982, 93899983, 93899984<br>93899985, 93899986, 93899987, 93899988, 93899989<br>93899991, 93899992, 93899993, 2346850, 2223929<br>2362384, 2015986, 93899941, 93899942, 93899943<br>93899944, 93899945, 93899946<br>If there is a clam then ODBFlag = Yes<br>If there is no claim then ODBFlag = No |
| Insulin Use             | ODB       | - Missing if ODB flag is no<br>- Yes if any prescription for insulin in 365 days prior to index date<br>- No if no insulin prescription in 365 days prior to index date                                                                                                                                                                                                                                                                                                                                                                                                                                 |
| Metformin Use           | ODB       | - Missing if ODB flag is no<br>- Yes if any prescription for metformin in 365 days prior to index date<br>- No if no metformin prescription in 365 days prior to index date                                                                                                                                                                                                                                                                                                                                                                                                                             |
| Non-meformin            | ODB       | - Missing if ODB flag is no                                                                                                                                                                                                                                                                                                                                                                                                                                                                                                                                                                             |

|                                                            |           |                                                                                                                                                                                                                                                                                                                                                                                                                                                                              |
|------------------------------------------------------------|-----------|------------------------------------------------------------------------------------------------------------------------------------------------------------------------------------------------------------------------------------------------------------------------------------------------------------------------------------------------------------------------------------------------------------------------------------------------------------------------------|
| oral hypoglycemic exposure                                 |           | <ul style="list-style-type: none"> <li>- Yes if any prescription for non-metformin oral hypoglycemic agent in 365 days prior to index date</li> <li>- No if no non-metformin oral hypoglycemic agent prescription in 365 days prior to index date</li> </ul>                                                                                                                                                                                                                 |
| Glucagon                                                   | ODB       | <ul style="list-style-type: none"> <li>- Missing if ODB flag is no</li> <li>- Yes if any prescription for glucagon in 365 days prior to index date</li> <li>- No if no glucagon prescription in 365 days prior to index date</li> </ul>                                                                                                                                                                                                                                      |
| Insulin Management Code                                    | OHIP      | Yes if G500 or G514 or G520 after incident ODD date. No if none of these.                                                                                                                                                                                                                                                                                                                                                                                                    |
| Insulin Management Code Date                               | OHIP      | Date of first eligible dxcode for insulin management                                                                                                                                                                                                                                                                                                                                                                                                                         |
| Basal insulin only                                         | ODB       | <ul style="list-style-type: none"> <li>- Missing if ODB flag is no</li> </ul> <p>See accompanying excel file ‘Insulin DINs’<br/> If patient has insulin use then check for Basal Insulin Only<br/> In Insulin DINs.xlsx basal insulin = 0 and bolus insulin = 1<br/> If subject has only basal insulin (only insulins that = 0 and none of the insulins that = 1) then basal insulin only = yes<br/> If subject has any insulins assigned 1 then basal insulin only = no</p> |
| Bolus Insulin                                              | ODB       | <ul style="list-style-type: none"> <li>- Missing if ODB flag is no</li> <li>- If any insulins =1 then bolus insulin = yes</li> </ul>                                                                                                                                                                                                                                                                                                                                         |
| Any DKA                                                    | DAD       | ICD9: 2501<br>If ICD9 code for DKA or either of the DKA codes below, then any DKA = yes. No DKA codes then DKA = no.                                                                                                                                                                                                                                                                                                                                                         |
| Hospitalization or Emergency Visit for Type 1 DKA          | DAD/NACRS | ICD10: E100, E101<br>Provide date of first eligible code.                                                                                                                                                                                                                                                                                                                                                                                                                    |
| Hospitalization or Emergency Visit for Possible Type 1 DKA | DAD       | ICD10: E110, E111, E130, E131, E140, E141<br>Provide date of first eligible code.                                                                                                                                                                                                                                                                                                                                                                                            |
| Insulin Pump Use                                           | ADP       | If IKN appears in ADP Insulin then pump = yes                                                                                                                                                                                                                                                                                                                                                                                                                                |
| Type 1 ICD10 Code                                          | DAD/NACRS | ICD10: E102, E103, E104, E105, O24001-O24093, O24501-O24504<br>Provide total number of these from April 1, 2002 to index date<br>Also provide yes/no if any code                                                                                                                                                                                                                                                                                                             |
| Type 2 ICD10 Code                                          | DAD/NACRS | ICD10: E11x, O24101-O24199, O24601-O24604<br>Provide total number of these from April 1, 2002 to                                                                                                                                                                                                                                                                                                                                                                             |

|                                                                                        |                                                       |                                                                                                                                                                                                                                                                                                                                                                                                                                                                                                                                                                                                                                                                                                                                                                                                                                                                                                |
|----------------------------------------------------------------------------------------|-------------------------------------------------------|------------------------------------------------------------------------------------------------------------------------------------------------------------------------------------------------------------------------------------------------------------------------------------------------------------------------------------------------------------------------------------------------------------------------------------------------------------------------------------------------------------------------------------------------------------------------------------------------------------------------------------------------------------------------------------------------------------------------------------------------------------------------------------------------------------------------------------------------------------------------------------------------|
|                                                                                        |                                                       | index date<br>Also provide yes/no if any code                                                                                                                                                                                                                                                                                                                                                                                                                                                                                                                                                                                                                                                                                                                                                                                                                                                  |
| Pediatric Diabetes: 4 physician service codes in any 1 year $\leq$ age 18              | OHIP                                                  | 250<br>Provide first date criteria met (date = 1 <sup>st</sup> of the 4 codes)                                                                                                                                                                                                                                                                                                                                                                                                                                                                                                                                                                                                                                                                                                                                                                                                                 |
| Pediatric DKA: inpatient admission or emergency department visit for DKA $\leq$ age 18 | DAD/NACRS                                             | ICD10: E100, E101, E110, E111, E130, E131, E140, E141<br>Provide date of first eligible code.                                                                                                                                                                                                                                                                                                                                                                                                                                                                                                                                                                                                                                                                                                                                                                                                  |
| Creatinine                                                                             | OLIS                                                  | Serum Creatinine (LOINC = 14682-9)<br>- Creatinine value for most recent creatinine                                                                                                                                                                                                                                                                                                                                                                                                                                                                                                                                                                                                                                                                                                                                                                                                            |
| Creatinine date                                                                        | OLIS                                                  | Date of most recent creatinine value                                                                                                                                                                                                                                                                                                                                                                                                                                                                                                                                                                                                                                                                                                                                                                                                                                                           |
| eGFR                                                                                   | OLIS<br><br>Assume all subjects are of non-black race | $eGFR = 141 \times \min(S_{cr}/\kappa, 1)^\alpha \times \max(S_{cr}/\kappa, 1)^{-1.209} \times 0.993^{Age} \times 1.018$ [if female]<br>$S_{cr}$ is serum creatinine in <b>mg/dL</b> ,<br>$\kappa$ is 0.7 for females and 0.9 for males,<br>$\alpha$ is -0.329 for females and -0.411 for males,<br>min indicates the minimum of $S_{cr}/\kappa$ or 1, and<br>max indicates the maximum of $S_{cr}/\kappa$ or 1<br><br><a href="https://www.niddk.nih.gov/health-information/communication-programs/nkdep/laboratory-evaluation/glomerular-filtration-rate-calculators/ckd-epi-adults-conventional-units">https://www.niddk.nih.gov/health-information/communication-programs/nkdep/laboratory-evaluation/glomerular-filtration-rate-calculators/ckd-epi-adults-conventional-units</a><br><br><u>Provide eGFR <math>\leq</math>30 yes/no</u><br><u>Provide eGFR <math>\leq</math>45 yes/no</u> |
| Partial Pancreatectomy                                                                 | DAD CCI Codes                                         | 1OJ87DA<br>1OJ87LA<br>1OJ87VC<br>1OJ87VK<br>1OK87LA<br>1OK87VZ<br>1OK87WA<br>1OK87XN                                                                                                                                                                                                                                                                                                                                                                                                                                                                                                                                                                                                                                                                                                                                                                                                           |
| Partial pancreatectmy date                                                             | DAD CCI                                               | 1 <sup>st</sup> Date for above code                                                                                                                                                                                                                                                                                                                                                                                                                                                                                                                                                                                                                                                                                                                                                                                                                                                            |
| Total Pancreatectomy                                                                   | DAD CCI Codes                                         | 1OJ89LA<br>1OJ89VZ<br>1OK89LA<br>1OK91LA<br>1OK91XN                                                                                                                                                                                                                                                                                                                                                                                                                                                                                                                                                                                                                                                                                                                                                                                                                                            |
| Total                                                                                  | DAD CCI                                               | 1 <sup>st</sup> Date for above code                                                                                                                                                                                                                                                                                                                                                                                                                                                                                                                                                                                                                                                                                                                                                                                                                                                            |

|                                 |               |                                                                                                                                                                                                                                                                                                                                                                                                         |
|---------------------------------|---------------|---------------------------------------------------------------------------------------------------------------------------------------------------------------------------------------------------------------------------------------------------------------------------------------------------------------------------------------------------------------------------------------------------------|
| pancreatectmy date              |               |                                                                                                                                                                                                                                                                                                                                                                                                         |
| Cystic Fibrosis                 | OHIP<br>DAD   | OHIP dx code 277<br>ICD10: any code beginning with E84<br>If either OHIP or ICD10 then CF = yes                                                                                                                                                                                                                                                                                                         |
| CF Source                       | OHIP<br>DAD   | If CF = yes then indicate if met criteria based on OHIP or based on DAD or both                                                                                                                                                                                                                                                                                                                         |
| CF Date                         | OHIP DAD      | 1st date for CF (1 <sup>st</sup> of either DAD or OHIP)                                                                                                                                                                                                                                                                                                                                                 |
| CFDR Flag1                      | CFDR          | If in CFR then CFDR Flag1 = yes, unless dispositionkey = 6 (determined not to have CF). If not in CFDR or if dispositionkey = 6 then CFDR Flag1 = no.                                                                                                                                                                                                                                                   |
| CFDR Flag2                      | CFDR          | If in CFDR and ComplicationKey = 4 (diabetes) then CFDR Flag 2 = yes. If not in CFDR or Complications do not include diabetes then CFDR Flag 2= no.                                                                                                                                                                                                                                                     |
| Islet Cell Transplant           | DAD CCI Codes | 1OJ83WKXXXA<br>1OJ85GRXXXK<br>1OJ85HAXXL<br>1OJ85WKXXXK                                                                                                                                                                                                                                                                                                                                                 |
| Islet cell transplant date      | DAD CCI       | 1 <sup>st</sup> Date for above CCI code                                                                                                                                                                                                                                                                                                                                                                 |
| Pancreatic Transplant           | DAD CCI Codes | 1OK85TLXXXK<br>1OK85TMXXXK<br>1OK85TNXXXK<br>1OK85XTXXXK<br>1OK85XUXXXK<br>1OK85XVXXXK<br>1OK87LA<br>1OK87VZ<br>1OK87WA<br>1OK87XN                                                                                                                                                                                                                                                                      |
| Pancreatic transplant date      | DAD CCI       | 1 <sup>st</sup> Date for above CCI code                                                                                                                                                                                                                                                                                                                                                                 |
| Diabetes After Other transplant | DAD CCI       | ODD incident date occurs any time <b>after</b> one of the following codes:<br><br>Any codes beginning with 1GR85, 1GT85 (lung), 1HY85 (heart + lung), 1HZ85 (heart), 1OA85 (liver), 1PC85 (kidney);<br>1LZ19HHU7A,<br>1LZ19HHU7J, 1LZ19HHU8A, 1LZ19HHU8J (stem cell)<br>1WY19HHXXXA, 1WY19HHXXI, 1WY19HHXXXJ, 1WY19HHXXM (bone marrow)<br>If any of the above codes present then other transplant = yes |
| Metformin                       | ODB           | subclnam = "ORAL ANTI-GLYCEMICS" and drugname includes metformin                                                                                                                                                                                                                                                                                                                                        |
| Insulin                         | ODB           | subclnam starts with "INSULIN"                                                                                                                                                                                                                                                                                                                                                                          |

|                                 |     |                                                                                                                                                                                                                                                                                                                                                                                                                                                                                                                                                                                                                                                                                                              |
|---------------------------------|-----|--------------------------------------------------------------------------------------------------------------------------------------------------------------------------------------------------------------------------------------------------------------------------------------------------------------------------------------------------------------------------------------------------------------------------------------------------------------------------------------------------------------------------------------------------------------------------------------------------------------------------------------------------------------------------------------------------------------|
|                                 |     | for basal versus bolus insulin see excel file 'insulin DINS'                                                                                                                                                                                                                                                                                                                                                                                                                                                                                                                                                                                                                                                 |
| Non-metformin oral hypoglycemic | ODB | <p>subclnam = "ORAL ANTI-GLYCEMICS" and drugname includes troglitazone or rosiglitazone or pioglitazone</p> <p>subclnam = "ORAL ANTI-GLYCEMICS" and drugname includes sitagliptin or saxagliptin or linagliptin or alogliptin</p> <p>subclnam = "ORAL ANTI-GLYCEMICS" and drugname includes acarbose</p> <p>subclnam = "ORAL ANTI-GLYCEMICS" and drugname includes canagliflozin or dapagliflozin or empagliflozin</p> <p>subclnam = "ORAL ANTI-GLYCEMICS" and drugname includes glyburide or chlorpropramide or gliclazide or glipizide or glimepiride</p> <p>subclnam = "ORAL ANTI-GLYCEMICS" and drugname includes repaglinide or nateglinide</p> <p>subclnam = "ANTI-DIABETIC AGENTS: MISCELLANEOUS"</p> |
| Glucagon                        | ODB | Sbuclname = pancreatic hormones and drugname includes glucagon                                                                                                                                                                                                                                                                                                                                                                                                                                                                                                                                                                                                                                               |
